# Supplementary material for: A structural equation model for the patient safety competency of clinical nurses
Source: PeerJ. 2024 Nov 26;12:e18462. doi: 10.7717/peerj.18462 (PMC11606321; doi:10.7717/peerj.18462)
Supplement: Supplemental Information 1 — Data include (1) nurse’s general characteristics (e.g., age, gender, status, attending safety education etc.) (2) The perception of patient safety culture (3) safety control (4) Patient safety competence. [file peerj-12-18462-s001.xlsx]

## Sheet: peerj-99768-Spss_data_code-safe
age	gender	religion	degree	M_S	department	status	career	Freq_safetyEdu	safetyedu	ppsc1	ppsc2	ppsc3	ppsc4	ppsc5	ppsc6	ppsc7	ppsc8	ppsc9	ppsc10	ppsc11	ppsc12	ppsc13	ppsc14	ppsc15	ppsc16	ppsc17	ppsc18	ppsc19	ppsc20	ppsc21	ppsc22	ppsc23	ppsc24	ppsc25	ppsc26	ppsc27	ppsc28	ppsc29	ppsc30	ppsc31	ppsc32	ppsc33	ppsc34	ppsc35	sc1	sc2	sc3	sc4	sc5
26	1	1	2	1	3	1	5	1	2	4	4	5	3	4	3	4	4	5	4	5	5	5	5	4	5	5	5	5	4	5	4	5	5	4	4	4	4	5	4	4	5	3	4	2	4	4	3	3	4
49	1	4	2	2	5	3	20	1	1	5	5	4	4	5	5	5	5	4	4	4	4	4	4	4	4	4	4	4	4	4	4	4	4	4	5	5	5	4	4	4	4	2	2	2	5	5	5	5	5
40	1	4	2	2	4	2	18	1	1	3	3	3	5	5	5	5	4	3	3	3	3	3	3	3	3	3	3	3	3	3	3	3	3	3	3	3	3	3	3	3	3	3	3	3	3	3	3	3	3
38	1	4	2	2	5	1	0.2	0	1	4	3	4	4	4	4	4	3	3	4	3	2	3	5	3	3	3	3	5	5	3	3	3	3	3	2	2	4	3	3	3	2	5	3	5	3	3	4	3	4
28	1	4	2	1	4	1	3	0	1	4	3	3	4	3	4	4	3	3	3	3	3	4	4	4	3	3	4	3	3	4	3	4	4	3	3	3	2	4	3	3	3	2	2	2	3	3	3	4	4
27	1	4	2	1	4	1	2	1	1	3	3	3	4	4	4	4	4	4	4	4	4	3	3	3	3	3	3	4	4	3	3	3	3	4	4	4	4	3	3	3	3	4	4	3	3	3	4	3	4
23	1	4	1	1	4	.	3	1	1	4	4	4	4	4	5	5	5	5	5	5	5	5	4	4	4	4	4	4	4	4	4	4	4	2	4	2	2	4	4	4	4	2	2	2	4	4	4	4	4
30	1	4	2	1	1	1	5	1	1	4	4	4	4	4	4	4	4	4	4	4	4	4	4	4	4	4	4	4	4	4	4	4	4	4	4	4	4	4	4	4	4	4	3	3	4	4	4	4	4
29	1	.	2	2	1	1	5	1	1	4	4	4	4	4	4	4	4	4	4	4	4	4	4	4	4	4	4	4	4	4	4	4	4	4	4	4	4	4	4	4	4	4	3	3	4	4	4	4	4
30	1	4	2	1	4	1	6	1	1	4	4	4	4	4	4	4	4	4	4	4	4	4	4	5	4	4	4	4	4	4	4	4	4	3	4	2	4	3	4	4	4	3	2	4	4	3	4	4	4
24	1	3	2	1	1	1	1	0	0	5	5	5	5	5	5	5	5	5	5	5	5	5	5	5	5	5	5	5	5	5	5	5	5	4	4	4	4	4	4	4	4	4	3	3	3	3	3	3	3
38	1	2	2	2	4	1	12	1	1	4	4	4	4	4	4	4	4	4	4	4	4	4	4	4	4	4	4	4	4	4	4	4	4	4	4	4	4	4	4	4	4	4	3	3	4	4	4	4	4
28	1	1	2	1	1	1	4	1	1	4	4	4	4	4	4	4	4	4	4	4	4	4	4	4	4	4	4	4	4	4	4	4	4	4	4	4	4	4	4	4	4	4	3	3	4	4	4	4	4
26	1	4	2	.	1	1	2	0	1	4	4	4	4	4	4	4	4	4	4	4	4	4	4	4	4	4	4	4	4	4	4	4	4	4	4	4	4	4	4	4	4	4	3	3	4	4	4	4	4
40	1	1	2	2	4	3	17	1	2	4	4	4	4	4	4	4	4	4	4	4	5	5	4	4	5	5	4	4	5	4	4	4	4	2	2	2	4	4	4	4	4	4	3	4	5	5	5	5	5
38	1	1	2	2	1	1	14	.	1	5	5	4	4	5	5	5	5	5	5	5	5	5	5	5	4	4	5	5	5	5	5	3	4	4	3	1	4	3	3	4	3	4	4	4	3	3	4	4	4
29	1	4	2	1	1	1	8	1	2	3	3	3	4	4	4	4	4	4	4	3	4	3	3	4	3	3	3	3	4	3	3	3	3	4	4	4	4	3	3	3	4	3	4	4	3	3	3	3	3
51	1	4	2	2	1	3	23	1	1	4	4	4	4	3	4	5	4	4	5	4	5	4	4	4	5	5	4	4	5	4	4	3	4	4	4	3	4	4	4	5	4	4	4	4	4	4	4	4	4
50	1	2	2	2	1	1	12	1	1	5	5	5	5	5	5	5	5	5	5	5	5	3	5	5	5	5	5	5	5	5	5	3	5	1	2	2	1	3	2	3	4	4	4	5	4	3	4	4	4
46	1	1	2	2	4	1	14	1	1	3	3	3	3	3	3	4	4	4	4	4	4	4	4	4	4	3	3	3	3	3	3	3	3	3	3	3	3	3	3	3	3	3	3	3	3	3	3	3	3
45	1	4	2	2	4	1	15	0	1	3	2	4	3	3	2	3	4	2	3	3	4	5	#NULL!	2	1	3	3	4	3	3	4	2	3	4	2	3	3	4	3	3	2	1	5	4	3	2	2	3	3
36	1	4	2	1	4	1	10	0	4	4	4	4	5	4	4	4	4	4	4	4	4	4	4	4	3	4	4	4	4	4	4	4	4	4	4	4	4	3	4	3	4	4	3	4	3	3	4	3	4
38	1	4	2	2	4	1	16	1	3.5	4	4	4	4	4	4	4	4	4	4	4	5	4	4	4	4	4	4	5	5	4	4	4	4	4	5	3	4	4	4	4	4	4	4	4	3	2	3	3	4
41	1	1	2	1	4	1	8	1	3	5	5	5	5	5	5	5	5	5	5	5	5	5	5	5	5	5	5	5	5	5	5	5	5	5	4	3	5	5	5	5	3	5	5	4	4	4	4	4	4
41	1	1	2	2	4	1	13	1	3	4	4	4	4	3	3	3	4	3	3	3	4	5	3	3	2	3	4	4	4	3	3	3	3	4	3	3	2	4	4	4	4	1	1	4	3	4	4	4	3
45	1	4	3	2	4	1	20	1	3	4	4	4	4	4	4	4	4	4	4	4	4	4	4	4	3	3	4	4	4	4	4	4	4	2	5	3	5	4	4	3	3	4	3	2	3	3	4	4	4
43	1	2	2	2	1	2	19	1	2	4	4	3	5	5	5	5	4	5	4	3	4	3	4	3	4	4	4	5	5	3	3	3	4	2	3	3	4	4	3	3	3	2	2	3	2	2	4	3	4
27	1	4	2	1	1	1	.	0	1	4	4	4	5	4	4	5	4	4	5	5	5	4	5	5	3	5	5	4	5	5	5	5	5	5	5	4	5	5	4	5	5	4	5	3	2	2	4	3	5
30	1	3	2	1	1	1	7	0	2	4	4	4	5	5	4	5	5	5	5	5	5	5	4	5	5	5	4	5	5	5	5	5	5	5	5	3	5	5	5	5	5	4	5	3	5	5	5	5	5
42	1	1	1	2	1	.	3	1	1	5	5	5	5	4	4	4	4	4	4	4	4	4	4	4	4	4	4	4	4	4	4	4	4	5	5	5	5	4	4	4	4	5	4	3	3	3	4	3	#NULL!
39	1	3	2	1	1	1	12	1	2	4	3	3	3	4	4	4	4	4	4	4	5	4	4	4	4	4	4	4	5	4	4	4	4	4	4	3	4	4	4	4	4	4	4	4	3	3	4	3	4
52	1	3	2	2	1	.	4	1	10	5	5	5	5	5	5	5	5	5	5	5	5	5	5	5	5	4	4	5	5	4	4	5	5	5	5	5	5	5	5	4	5	4	5	4	5	5	4	3	5
32	1	4	2	1	1	1	8	1	1	4	4	4	4	4	4	4	3	4	4	4	4	4	4	4	4	4	4	5	4	4	3	2	4	4	4	3	4	4	3	4	4	3	3	2	3	3	4	3	3
36	1	1	2	1	1	1	9	1	1	4	4	4	4	4	4	4	3	3	4	4	4	3	3	4	3	4	4	4	4	3	3	3	3	5	3	2	4	4	5	5	5	3	5	5	3	3	4	4	5
38	1	1	2	2	1	1	4	1	10	5	5	5	5	5	5	5	5	5	5	4	5	5	4	4	4	4	5	5	5	5	5	5	5	5	5	3	5	4	5	4	4	5	5	5	2	2	4	4	4
29	1	4	2	1	1	1	1.5	1	12	4	4	4	4	4	4	4	3	3	4	4	5	5	5	5	4	3	3	5	4	4	4	4	4	4	4	2	4	3	4	4	4	4	4	2	3	3	4	4	4
51	1	4	2	2	1	3	25	1	10	5	5	5	5	5	5	5	5	5	5	5	5	3	4	5	5	5	5	5	5	5	4	4	5	4	5	2	5	4	4	4	4	4	4	3	5	5	5	5	5
38	1	4	2	2	1	1	15	1	10	5	5	5	5	5	5	5	5	5	5	5	5	5	5	5	5	5	5	5	5	5	5	5	5	5	5	5	5	5	5	5	5	3	2	3	4	4	4	4	4
50	1	3	2	2	1	.	9	1	10	4	4	4	5	5	5	5	5	5	5	5	5	5	5	5	4	4	4	4	4	5	5	5	5	4	4	2	4	4	4	4	4	3	4	4	4	4	4	4	4
28	1	4	2	1	1	1	4	1	2	3	4	4	4	3	4	4	4	4	4	3	4	4	4	4	4	4	4	4	4	4	4	4	4	4	1	3	3	4	4	4	2	4	4	2	4	4	4	4	5
34	1	3	2	1	1	1	6	1	2	3	3	3	3	3	3	3	3	3	3	3	3	3	3	3	3	3	3	3	3	3	3	3	3	3	3	3	3	3	3	3	3	3	3	3	3	3	3	3	3
41	1	1	2	2	1	1	20	1	2	5	5	5	5	5	5	5	5	5	5	5	5	5	5	5	5	5	5	5	5	5	5	4	5	4	4	3	5	4	5	5	4	4	3	4	5	4	5	5	5
29	1	1	2	1	5	1	5	1	2	2	3	3	4	4	4	3	3	3	4	4	4	4	4	4	4	4	4	4	4	3	3	3	3	4	4	4	3	3	3	3	3	3	3	3	3	3	3	3	3
32	1	1	2	2	5	1	8	1	2	3	5	3	3	4	4	4	4	3	4	4	4	4	4	4	4	4	4	4	4	4	4	4	4	3	2	2	2	3	4	4	3	2	2	3	5	5	5	5	5
38	1	4	2	2	5	1	5	1	1	3	2	3	4	5	5	4	3	3	1	2	5	1	4	3	5	5	5	5	3	2	3	3	3	1	5	4	5	5	1	3	3	5	3	5	3	3	5	4	5
0	1	4	2	2	5	1	8	0	1	4	4	4	4	3	3	4	4	4	4	4	4	3	4	3	3	5	5	5	5	2	3	2	4	4	4	4	4	4	4	4	4	4	4	3	3	3	4	4	4
30	0	4	2	1	5	.	3	1	2	3	3	3	3	3	3	3	3	3	3	3	3	3	3	3	3	3	3	3	3	3	3	3	3	3	3	3	3	3	3	3	3	3	3	3	3	3	3	3	3
36	1	4	2	1	5	1	11	1	2	3	3	3	3	3	3	3	3	3	3	3	3	3	3	3	3	3	3	3	3	3	3	3	3	3	3	3	3	3	3	3	3	3	3	3	2	2	3	2	2
40	1	4	2	2	5	1	.	1	1	4	4	4	4	4	4	4	4	4	4	4	4	4	4	4	4	4	4	4	4	4	4	4	4	2	4	4	4	3	4	4	4	2	4	2	3	3	4	4	4
30	1	1	2	2	4	1	10	1	1	2	3	2	4	4	4	4	3	3	4	2	4	2	4	3	3	4	4	4	4	2	2	2	4	4	5	4	4	4	2	2	2	5	4	4	2	2	4	4	4
50	1	2	2	2	5	0	8	1	1	4	4	4	4	4	4	4	4	4	4	4	4	4	3	4	3	3	4	4	4	4	4	4	4	4	2	2	4	3	4	4	4	3	4	3	3	3	3	4	4
32	1	3	2	1	4	1	6	1	1	3	3	4	4	4	3	3	3	4	4	4	4	4	4	4	3	3	3	3	3	3	3	3	3	2	2	2	2	4	4	4	4	2	2	2	4	4	4	4	4
0	1	1	2	2	5	.	5	1	1	5	5	5	5	5	5	5	5	5	5	5	5	5	5	5	5	5	5	5	5	5	5	5	5	5	5	1	5	5	5	5	4	5	5	5	5	5	5	5	5
48	1	1	2	2	4	1	.	1	1	4	4	4	4	4	4	4	4	4	4	4	4	4	4	4	4	4	4	4	4	4	4	4	4	2	2	2	2	4	4	4	4	2	2	2	4	4	4	4	4
37	1	1	2	2	4	1	.	1	1	4	4	4	4	4	4	4	4	4	4	4	4	4	4	4	4	4	4	4	4	4	4	4	4	2	2	2	2	4	4	4	4	2	2	2	4	4	4	4	4
40	1	1	2	1	3	1	15	1	2	3	5	3	5	5	5	5	5	5	5	5	5	5	5	5	5	5	5	5	5	5	5	4	5	5	5	5	5	5	5	5	5	5	5	5	5	4	5	5	5
32	1	1	2	1	3	1	7	1	2	4	4	4	4	4	4	4	5	4	4	4	4	4	4	4	4	4	4	4	4	4	4	4	4	3	4	4	3	5	4	4	4	4	4	4	4	4	4	4	4
40	1	3	2	2	3	2	13	1	2	4	4	4	3	4	3	2	4	4	4	4	5	4	4	4	3	4	4	4	3	3	3	3	3	3	3	4	4	#NULL!	3	4	3	2	3	2	4	3	4	4	4
23	1	4	1	1	3	#NULL!	3	1	2	3	4	4	4	4	4	4	4	4	5	4	4	4	4	4	4	4	4	4	4	4	4	4	4	2	4	3	4	4	4	4	5	3	2	2	3	4	4	3	4
30	1	4	2	1	3	1	3	0	1	4	3	5	5	5	5	5	4	5	4	3	3	4	4	4	4	4	5	4	4	4	4	4	4	5	5	4	5	4	4	4	4	4	4	4	4	3	4	4	4
30	1	4	2	1	3	1	3	0	1	4	4	3	3	3	3	3	3	4	4	3	4	2	3	3	3	4	4	4	4	3	3	3	4	4	4	3	4	2	3	3	3	3	4	3	3	3	3	3	2
28	1	4	2	1	3	1	2	0	2	4	4	4	5	4	5	4	4	4	3	4	5	4	3	4	3	4	4	4	4	4	4	4	4	4	4	3	2	4	4	4	4	3	3	3	3	3	4	4	5
40	1	3	2	2	3	3	18	1	2	3	4	4	4	4	5	5	5	5	5	5	4	5	5	5	5	4	5	5	5	4	4	4	4	4	4	2	4	5	5	5	4	2	4	2	5	5	5	4	5
30	1	4	2	1	3	1	7	1	2	4	5	4	4	5	5	4	5	5	5	4	5	4	5	4	3	3	4	4	4	4	4	4	4	3	5	5	5	4	4	4	4	3	2	4	3	3	4	4	4
0	0	1	2	1	3	1	2	0	2	3	4	4	4	4	5	5	3	4	4	4	5	4	3	3	2	3	4	4	4	3	3	4	3	2	5	2	4	2	3	3	3	2	2	2	3	3	4	3	4
41	1	1	2	2	3	1	11	0	2	3	3	3	3	3	3	3	3	3	3	3	3	3	3	3	3	3	3	3	3	3	3	3	3	3	3	3	3	3	3	3	3	3	3	3	3	3	3	3	3
28	1	1	2	1	3	1	5	1	2	4	4	4	4	4	4	4	3	3	4	4	3	4	4	4	4	4	4	4	4	3	3	4	4	3	3	4	4	4	3	4	4	2	2	3	3	3	3	4	3
29	1	3	2	1	1	1	5	1	2	3	3	3	5	5	5	5	5	5	5	5	5	5	5	5	4	5	5	5	5	5	5	5	3	4	5	4	4	4	4	4	4	4	4	3	3	3	4	4	4
28	1	1	2	1	1	1	4	0	2	3	4	4	4	4	4	4	4	4	5	5	5	5	5	5	5	5	5	5	5	4	4	4	4	4	4	3	4	4	4	4	4	4	4	3	5	5	5	5	5
56	1	1	2	2	1	.	1.5	0	2	4	4	4	5	4	4	4	4	4	5	5	5	5	5	5	4	4	5	5	5	5	5	5	5	3	3	2	4	4	4	4	4	4	4	2	4	3	5	4	5
50	1	1	1	2	1	.	4	1	2	4	4	4	4	4	4	4	4	4	4	4	4	4	4	4	4	4	4	4	4	4	4	4	4	3	3	4	4	4	4	4	4	4	4	4	3	3	4	4	4
53	1	1	1	2	1	.	5	1	2	4	4	4	5	5	5	5	4	4	4	4	4	5	5	4	4	4	4	4	4	5	5	4	4	3	3	3	4	4	4	4	4	4	4	2	4	3	4	4	4
31	1	4	2	1	1	1	8	0	2	3	4	4	4	4	4	4	3	4	4	4	4	4	4	3	3	4	4	4	4	4	4	4	4	2	4	4	4	3	2	4	3	3	2	2	2	2	3	4	4
48	1	1	2	2	1	1	20	1	2	5	5	4	5	5	5	5	4	5	5	5	4	4	5	5	5	5	4	5	5	4	5	4	5	4	4	4	4	4	4	4	4	5	5	4	4	3	4	4	4
28	1	2	2	2	1	1	6	1	2	3	3	3	3	3	3	3	3	3	3	3	3	3	3	3	3	3	3	3	3	3	3	3	3	3	3	3	3	3	3	3	3	3	3	3	3	3	3	3	3
42	1	4	2	2	1	1	4	0	1	4	3	4	4	4	4	4	4	4	4	4	4	4	4	4	4	4	4	5	5	4	4	3	3	2	4	4	4	3	3	3	4	3	4	4	2	2	3	3	4
53	1	2	2	2	1	1	29	1	2	4	4	4	4	4	4	4	4	4	4	4	4	4	4	4	4	4	4	4	4	4	4	4	4	4	4	4	4	4	4	4	4	4	4	4	4	4	4	4	4
52	1	1	2	2	1	2	26	1	2	3	3	4	4	4	4	4	4	4	4	4	4	4	4	4	4	4	4	5	5	4	4	3	4	5	5	4	5	2	4	4	4	5	5	5	4	3	4	4	4
48	1	1	2	2	1	1	10	1	1	3	3	3	3	3	2	2	3	1	2	1	2	3	3	3	3	3	3	2	2	3	#NULL!	1	1	3	3	5	5	1	2	2	1	3	4	4	4	4	4	4	4
30	1	4	2	1	1	1	9	1	1	4	4	4	4	4	3	4	3	4	3	4	3	4	4	4	4	3	4	4	3	4	4	4	4	2	2	2	3	4	4	3	3	3	2	2	4	4	3	4	4
32	1	3	2	2	1	1	7	0	1	3	3	3	3	3	3	3	3	3	3	3	3	3	3	3	3	3	3	3	3	3	3	3	3	3	3	3	3	3	3	3	3	3	3	3	3	3	3	3	3
27	1	3	2	1	1	1	1	0	1	3	3	4	4	4	4	4	3	3	4	4	4	4	4	4	4	4	4	4	4	4	4	4	4	3	3	4	4	3	3	3	3	4	4	3	3	3	3	3	4
27	1	1	2	1	1	1	2	0	1	3	2	5	5	5	5	5	5	5	5	5	5	5	5	5	5	4	4	5	5	4	4	4	5	4	4	4	4	4	4	4	4	2	4	2	3	4	3	3	5
31	1	4	2	1	1	1	3	0	2.5	2	2	2	3	3	3	3	2	3	4	4	3	2	3	3	4	4	3	4	4	3	3	3	4	4	4	4	3	3	3	3	1	4	3	2	2	3	4	4	4
20	0	4	2	1	5	1	10	1	2	2	2	2	3	4	4	4	3	3	3	3	4	3	4	3	4	4	4	4	4	3	3	3	3	2	3	4	4	4	3	3	3	4	4	4	1	1	2	3	3
39	1	1	2	2	4	1	17	1	5	2	3	3	5	5	5	5	2	4	4	4	5	5	5	5	5	5	4	5	5	3	4	3	4	3	4	1	4	3	4	4	1	5	5	4	5	5	5	5	5
39	1	4	1	2	4	.	3	0	2	3	3	3	3	3	3	3	3	3	3	3	4	3	5	3	3	3	3	5	5	3	3	3	3	3	5	5	5	3	3	3	3	5	5	5	3	3	3	3	3
58	1	1	2	2	4	.	30	1	2	4	4	5	5	4	5	4	4	4	4	4	4	4	5	4	4	4	4	5	5	5	5	4	4	4	4	4	4	2	4	2	2	4	4	4	2	2	2	2	4
34	1	4	2	2	4	.	10	1	10	4	3	4	4	3	3	4	3	3	4	4	4	3	4	4	4	4	4	4	4	3	3	3	4	3	2	2	2	3	3	2	2	2	3	4	1	1	4	4	4
42	1	1	2	2	1	2	11	1	2	4	4	4	3	4	4	4	3	4	3	3	4	3	5	3	3	4	4	3	5	3	2	2	3	4	5	3	5	3	3	3	3	2	4	3	3	3	3	3	3
29	1	2	2	1	1	1	7	1	0	2	2	1	2	2	2	3	23	2	2	4	3	3	3	3	3	3	3	3	3	3	3	3	3	3	3	3	3	3	2	3	3	3	3	3	3	3	3	4	3
54	1	4	2	1	1	3	25	1	2	4	4	4	4	4	4	4	3	4	4	4	4	3	4	4	4	4	3	4	4	3	3	3	4	3	3	3	3	4	3	3	3	3	3	3	3	3	3	3	3
53	1	4	2	2	4	2	20	1	2	4	3	4	4	4	4	5	3	4	3	3	4	3	4	3	2	3	3	5	5	3	#NULL!	2	3	4	4	2	4	3	2	2	2	4	3	4	3	3	4	4	5
45	1	1	2	2	4	1	13	1	2	4	4	3	3	3	3	4	4	4	4	4	5	4	5	4	4	4	4	5	4	4	3	4	4	4	4	4	4	3	3	4	3	4	4	4	2	2	5	4	4
39	.	4	2	2	4	.	16	1	2	5	4	5	5	5	5	5	4	5	5	5	5	5	4	4	4	5	4	5	5	4	4	4	4	4	5	4	4	3	3	3	4	4	5	4	4	4	5	4	4
47	1	1	2	1	2	2	20	1	1	3	4	4	4	4	4	3	3	4	4	4	4	4	4	4	4	4	3	4	4	4	4	4	4	2	2	2	2	4	3	3	3	4	3	4	4	2	4	4	4
28	1	1	2	1	2	1	2	1	3	4	3	4	5	3	4	4	3	4	#NULL!	3	4	4	3	3	4	5	4	4	3	4	4	3	4	3	2	2	2	3	3	4	4	3	1	2	3	4	5	4	4
37	1	3	3	2	2	.	8	1	3	4	4	4	4	4	4	4	4	4	4	4	4	4	4	4	4	4	4	4	4	4	4	4	4	4	4	4	4	4	4	4	4	4	4	4	4	4	4	4	4
35	1	1	2	2	5	.	12	1	1	3	3	3	2	2	2	2	2	2	2	2	2	2	2	2	2	2	2	2	2	3	3	3	3	3	3	3	3	3	3	3	3	3	3	3	4	4	4	4	4
25	1	4	2	1	1	1	2	1	1	4	4	3	4	4	4	5	3	3	4	4	4	4	4	4	4	5	5	4	4	4	4	4	4	4	5	3	5	4	3	4	3	4	4	3	3	3	3	3	3
26	1	4	2	1	5	1	2	0	2	4	4	4	3	4	3	3	3	4	4	3	3	3	3	4	5	4	3	4	3	3	3	4	4	5	5	4	5	4	4	4	3	3	4	3	3	3	3	3	3
33	1	1	2	1	1	1	3	1	1	4	4	5	5	5	5	5	5	5	4	5	5	4	4	5	4	4	5	5	5	5	4	5	5	4	5	3	4	3	4	4	5	2	2	2	3	4	4	3	5
28	1	4	2	1	4	.	1	1	1	4	4	4	4	4	4	4	4	4	4	4	4	4	3	4	5	5	5	5	5	4	4	5	4	3	4	2	3	3	4	4	5	2	2	2	4	5	5	4	5
23	1	4	2	1	2	1	3	1	5	3	3	3	4	3	3	3	3	3	4	3	3	3	4	3	3	3	3	3	3	3	3	3	3	3	2	3	2	3	3	3	4	3	3	3	3	3	3	4	3
49	1	1	2	2	2	2	13	1	2	4	4	4	5	5	5	3	3	3	4	3	5	4	4	4	5	5	4	5	5	4	4	4	4	2	4	3	4	4	3	3	3	4	3	2	2	2	4	4	4
41	1	1	2	2	2	2	17	1	2	4	3	4	4	4	4	5	4	4	4	4	4	3	4	4	4	4	4	4	4	4	4	4	4	3	5	4	5	4	4	4	4	3	3	4	2	2	4	4	4
27	0	4	2	1	2	1	1	0	3	4	3	4	5	5	5	5	4	4	4	3	4	4	4	4	4	4	3	5	4	4	4	4	4	4	5	3	4	4	3	3	4	3	3	3	3	3	4	4	4
26	1	4	2	1	2	1	1	0	2	4	4	4	4	4	4	4	4	3	3	4	3	4	4	#NULL!	4	4	4	4	4	3	4	4	4	3	4	4	4	3	4	4	4	4	4	4	5	5	5	5	5
50	1	1	2	2	2	3	26	1	2	3	3	4	4	4	4	4	4	4	4	4	4	3	3	3	4	4	4	4	4	3	4	3	4	3	4	3	4	4	4	4	3	3	4	2	4	4	4	4	4
35	1	4	2	1	2	1	8	1	2	4	4	4	4	4	4	4	4	4	4	4	5	3	4	4	4	4	4	4	4	4	4	4	4	4	4	4	5	4	4	4	4	3	4	2	4	4	4	4	5
29	0	4	2	1	2	1	1	0	1	5	5	5	5	5	5	5	5	5	5	5	5	5	5	5	5	5	5	5	5	5	5	4	5	4	5	4	5	5	5	4	5	5	5	4	3	3	4	4	4
40	1	4	2	2	2	.	14	1	1	3	3	4	4	4	4	4	4	4	4	4	4	2	4	4	4	4	3	5	4	4	4	4	4	3	4	2	2	4	4	4	4	4	3	4	3	3	3	4	4
32	1	4	2	1	2	1	3	0	1	3	3	3	3	3	3	3	3	3	3	3	3	3	3	3	3	3	3	3	3	3	3	3	3	3	2	3	2	3	3	3	3	3	3	3	4	4	4	4	4
39	1	4	2	2	1	2	0	1	2	4	4	4	4	4	4	4	4	4	4	4	4	4	5	5	4	5	4	5	4	5	4	4	4	4	4	4	4	4	4	4	4	2	2	2	4	4	4	4	4
40	1	4	1	2	1	.	.	0	4	3	4	5	5	3	3	3	3	3	2	4	4	4	4	5	4	4	4	4	4	4	4	4	4	2	2	2	2	4	4	4	4	3	3	2	3	3	3	4	3
26	1	4	2	1	1	1	2	0	2	4	4	4	4	4	4	4	4	4	4	4	4	4	4	4	4	4	4	4	4	5	5	5	5	2	2	3	4	2	2	3	3	3	4	4	3	3	3	3	3
46	1	4	2	2	1	3	20	1	2	4	4	4	4	4	4	4	4	4	4	4	4	4	4	4	4	4	4	4	4	4	4	4	4	3	3	3	3	4	4	4	4	2	2	2	4	4	4	4	4
28	1	1	2	1	1	1	1	0	3	4	4	3	3	3	3	3	3	3	4	3	4	4	4	4	4	4	3	3	3	3	3	3	4	3	3	3	4	2	3	3	3	3	4	3	3	3	3	3	4
54	1	4	2	2	1	1	17	0	4	3	3	3	4	3	3	3	3	4	4	4	4	3	3	3	3	4	3	3	3	3	3	3	3	3	3	2	3	3	2	2	3	2	2	2	3	4	3	3	4
55	1	4	2	1	5	.	.	1	3	2	2	2	1	2	2	2	3	2	2	3	3	3	2	2	3	2	3	4	3	3	2	1	1	2	4	4	5	5	1	4	1	4	#NULL!	3	2	2	1	1	1
48	1	3	2	2	1	3	20	1	2	4	4	1	5	5	5	5	4	5	4	5	5	4	4	4	4	4	4	4	5	3	3	3	3	5	5	5	5	1	1	1	4	5	3	1	4	4	4	5	5
58	1	1	2	2	.	3	24	1	4	4	4	4	4	4	4	2	4	4	4	3	3	3	4	4	4	5	5	4	4	4	4	4	4	2	3	3	5	4	4	4	4	4	4	2	5	4	4	4	4
29	1	2	2	2	5	1	5	1	2	2	4	3	2	4	3	4	3	2	3	4	3	4	2	4	4	3	1	3	3	2	2	4	3	3	2	2	3	2	#NULL!	3	3	4	2	1	2	2	1	2	1
50	1	4	3	2	4	3	28	1	3	2	3	2	2	2	2	2	3	1	2	3	2	1	2	2	3	3	3	2	2	2	2	2	3	3	3	3	3	3	3	3	3	2	1	4	3	3	4	4	3
27	1	4	2	1	1	1	6	1	1	3	3	3	4	4	4	4	4	4	4	4	4	4	4	4	4	4	4	4	5	3	3	2	3	4	4	4	5	3	3	4	4	3	4	2	3	3	3	3	4
35	1	4	2	2	5	1	10	1	2	3	3	3	4	4	3	3	3	3	3	3	3	3	3	3	3	3	3	3	3	3	3	3	3	4	4	3	3	2	2	2	2	4	3	4	2	2	2	3	3
31	1	2	2	3	5	1	7	1	2	4	3	3	4	4	4	4	4	4	4	3	4	4	3	3	4	4	4	4	4	3	3	3	3	4	4	4	4	4	3	3	3	4	4	2	2	2	4	3	4
40	1	4	2	2	5	3	18	1	2	4	4	4	4	4	3	4	4	4	4	3	4	3	3	3	4	4	4	4	4	3	4	3	4	2	2	3	3	4	4	4	3	3	3	4	4	4	4	4	4
40	0	4	1	.	3	1	8	1	2	3	3	4	4	4	4	4	4	4	3	3	4	3	3	4	4	3	3	3	4	3	3	4	4	4	4	4	4	4	4	4	3	3	3	3	3	3	3	3	3
27	0	4	2	1	3	1	1	0	0	3	2	3	3	2	3	5	3	3	3	4	3	3	3	4	3	3	3	5	5	4	3	3	4	4	3	3	5	3	3	3	1	3	3	3	1	1	5	1	4
28	1	2	2	1	3	1	3	1	2	2	3	2	3	2	4	4	4	4	4	4	4	4	4	4	4	4	4	4	4	3	3	3	3	3	4	4	3	2	2	3	2	4	3	3	3	3	4	3	4
38	1	1	2	2	3	2	13	1	2.5	3	3	3	4	4	4	4	3	4	3	3	4	3	4	3	3	3	3	4	4	3	3	3	3	3	3	4	3	3	3	3	3	3	4	4	3	3	3	3	4
45	0	1	1	1	3	.	20	1	2	4	4	4	5	4	4	4	4	5	5	4	5	4	5	4	5	4	4	4	4	5	4	4	4	4	4	4	4	4	4	4	4	4	4	4	5	5	5	5	5
48	1	1	2	2	3	3	21	1	5	4	4	4	3	4	4	4	3	3	3	3	4	4	4	4	3	2	#NULL!	4	4	2	3	4	3	4	2	3	2	4	4	4	3	3	2	2	3	3	4	4	3
36	0	4	2	1	3	1	3	1	2	3	3	3	3	3	3	3	3	3	3	3	3	3	3	3	3	3	3	3	3	3	3	3	3	3	3	3	3	3	3	3	3	3	3	3	3	3	3	3	3
30	0	4	2	1	3	1	2	0	1	3	3	3	4	4	4	4	3	4	3	3	4	3	4	4	4	4	4	4	4	3	3	3	4	4	4	3	4	3	2	3	4	2	3	3	3	3	4	3	4
34	1	4	2	2	3	1	7	1	1	3	3	3	3	3	4	4	3	3	3	4	4	3	2	3	2	2	3	3	3	3	3	3	3	3	4	4	4	2	2	2	3	3	3	3	4	4	4	4	4
29	1	1	2	1	3	1	4	1	2	2	3	4	4	3	4	3	4	3	3	4	3	3	4	4	4	4	4	4	4	3	3	3	3	3	2	3	3	2	3	3	3	4	3	3	3	2	3	3	4
41	1	1	2	2	3	2	17	1	2	3	3	3	3	3	3	3	3	3	3	3	3	3	3	3	4	3	3	3	3	3	3	3	3	3	3	3	3	3	3	3	3	2	3	3	2	2	3	4	4
24	1	3	2	1	1	1	1	0	2	4	3	4	4	4	4	4	3	4	4	4	4	3	3	3	3	3	4	4	4	3	3	3	3	4	3	3	4	3	3	3	3	3	2	3	3	3	3	3	3
26	1	3	2	1	1	1	2	0	2	3	3	3	4	3	4	4	3	5	4	5	4	4	5	4	5	5	5	4	4	3	4	4	3	2	4	4	5	3	3	4	5	4	3	2	4	4	4	4	4
40	1	4	2	2	1	2	15	1	3	4	4	4	4	4	4	4	4	4	4	4	5	4	4	4	5	5	5	5	5	4	4	3	3	5	5	3	5	4	4	4	4	3	2	2	4	4	4	4	4
39	1	1	2	2	1	2	12	1	3	4	4	4	4	4	4	4	4	4	4	4	4	4	4	4	4	4	4	4	5	4	4	3	4	4	5	2	4	3	3	4	3	4	3	4	4	4	4	4	4
47	1	4	2	2	1	3	18	1	2	4	4	4	5	5	5	5	5	3	4	4	4	4	4	4	4	5	4	5	5	4	4	3	5	3	5	2	4	5	4	3	3	3	5	4	4	4	5	5	5
37	1	4	2	2	5	.	13	1	2	4	4	4	4	4	4	4	4	4	4	4	4	4	4	4	4	4	4	4	4	3	3	3	3	4	4	4	4	4	4	3	4	4	4	2	3	3	4	4	4
40	1	4	2	3	5	2	10	1	2	4	3	3	4	4	4	4	3	4	4	3	4	2	3	3	3	3	3	4	3	3	3	3	3	2	3	3	4	2	3	3	3	3	3	3	3	2	3	3	3
36	1	4	2	2	5	1	16	1	2	2	3	2	3	4	4	4	3	3	3	3	4	3	3	3	3	3	3	4	4	3	3	3	3	4	3	2	3	3	3	3	3	5	3	3	3	3	4	4	4
30	1	4	2	1	5	2	9	1	2	4	4	4	4	4	4	5	5	5	4	4	5	4	3	4	4	5	4	5	5	4	4	4	4	4	5	4	5	4	4	3	3	3	4	2	4	4	4	4	4
39	1	4	2	2	5	1	15	1	2	3	2	2	4	4	4	4	2	4	3	2	4	5	2	3	4	3	4	4	4	2	2	2	3	4	4	4	4	3	3	4	3	3	3	2	2	2	4	3	4
46	1	2	2	2	3	1	17	1	1.5	4	3	3	4	4	4	4	3	3	4	4	4	4	4	4	4	3	4	4	5	4	3	3	4	3	4	4	4	3	4	3	3	3	3	2	4	3	4	4	5
52	1	4	2	2	1	3	15	1	1	4	3	3	4	4	3	4	3	4	4	4	4	4	4	3	4	4	4	4	4	4	4	3	3	4	3	2	4	3	3	3	3	3	3	4	4	4	4	4	4
27	1	4	2	1	1	1	3	1	0	3	3	3	3	3	3	3	3	3	3	3	3	3	3	3	3	3	3	3	3	3	3	3	3	3	3	3	3	3	3	3	3	3	3	3	3	3	3	3	3
53	1	3	2	2	1	1	15	1	4	4	4	4	4	4	4	4	4	4	4	4	4	4	4	4	4	4	4	4	4	4	4	4	4	3	3	3	3	3	3	3	3	3	3	3	4	4	4	4	4
25	1	4	2	1	1	1	1	1	5	4	5	4	5	5	5	5	5	4	5	4	4	4	5	5	4	5	5	4	5	5	5	3	4	4	5	5	5	5	5	4	4	2	3	2	4	5	5	3	5
52	1	4	2	3	1	1	25	0	4	4	4	4	4	4	4	4	4	4	4	4	4	4	4	4	4	4	4	4	4	4	4	4	4	3	4	3	4	3	4	4	3	3	4	4	4	4	4	4	4
61	1	2	2	2	1	3	25	1	4	3	4	3	4	3	3	4	2	3	4	4	4	3	4	3	3	3	3	3	4	3	3	3	3	3	4	4	4	3	3	3	3	2	2	4	4	2	4	4	4
55	1	4	2	2	1	1	10	1	4	4	4	4	4	4	4	2	4	4	4	4	4	4	4	4	4	4	4	4	4	4	4	3	4	4	4	2	4	4	4	4	4	4	4	3	4	3	3	3	3
25	0	4	2	1	1	1	1	0	6	5	5	5	5	4	4	4	5	4	5	5	4	4	4	5	4	4	4	4	4	5	5	5	5	5	4	3	4	3	4	4	4	4	5	5	4	4	4	4	4
30	1	4	2	1	1	1	5	1	8	4	4	4	4	4	4	4	4	4	5	5	5	5	4	5	4	4	4	4	5	4	4	4	4	4	4	4	4	4	4	4	4	4	4	4	4	4	4	4	4
25	0	4	2	1	1	1	2	1	6	2	3	3	4	4	3	3	4	4	4	2	3	3	4	2	4	4	4	4	5	2	2	2	4	4	4	4	4	3	2	2	3	4	2	2	2	3	3	3	4
25	1	4	2	1	1	1	.	1	12	5	4	4	4	5	4	4	5	4	5	4	4	5	4	4	4	5	5	4	4	4	4	5	4	4	4	4	4	4	4	4	4	4	4	4	3	4	4	4	4
45	1	4	2	2	1	1	24	1	12	4	4	4	4	4	4	4	4	4	4	4	4	4	4	4	4	4	4	4	4	4	4	4	4	2	4	4	4	4	4	4	4	4	4	4	3	3	3	5	5
28	1	4	2	1	5	1	2	1	10	4	4	4	5	3	5	5	4	4	4	4	3	4	3	4	5	5	5	5	4	4	4	4	4	5	4	5	5	4	4	3	3	2	2	2	3	3	5	3	5
56	1	1	2	2	1	1	20	1	12	3	5	.	5	5	5	2	5	5	4	4	4	5	4	4	4	4	4	5	4	4	4	4	4	4	4	2	5	3	3	#NULL!	#NULL!	3	5	2	3	3	3	3	5
51	1	4	2	2	1	1	15	1	12	4	4	4	4	4	5	4	4	4	5	4	4	4	4	4	4	4	4	4	5	5	5	4	4	5	4	4	4	4	4	4	4	3	4	2	3	3	4	4	4
58	1	1	2	2	1	3	32	1	12	5	4	5	4	4	4	4	5	4	4	4	3	4	4	4	4	4	4	5	4	5	4	3	4	3	4	3	3	4	4	4	4	3	4	2	3	3	4	4	4
53	1	1	2	2	1	2	21	1	12	4	4	4	5	3	3	4	4	3	5	5	5	5	3	4	5	5	5	4	5	4	4	4	4	4	5	3	4	3	3	4	5	3	2	2	2	1	5	3	4
53	1	1	2	2	1	1	10	1	12	4	4	5	4	4	4	4	4	4	4	3	3	4	4	4	4	4	4	4	5	4	4	4	4	4	4	4	3	4	3	4	4	2	4	4	3	3	3	4	4
52	1	1	2	2	1	1	4	1	2	4	4	5	5	4	5	2	4	3	4	5	5	5	4	5	4	4	4	5	4	4	4	2	4	3	4	4	4	4	4	4	3	4	2	3	3	3	4	4	4
33	1	4	2	1	1	1	10	1	1	4	4	4	4	4	5	4	4	5	5	5	4	4	4	4	4	4	4	4	4	4	4	4	4	4	4	4	4	3	4	4	4	4	3	3	3	2	3	3	4
42	1	4	2	2	5	1	14	1	1	5	4	4	4	4	4	4	4	4	5	5	5	5	5	5	4	4	4	4	4	4	4	4	4	5	5	5	5	1	4	4	4	2	5	5	3	3	3	3	3
29	1	2	2	1	1	1	2	0	0	3	3	3	3	4	3	4	3	4	4	4	4	4	4	4	4	4	4	4	4	3	3	4	3	3	3	3	2	4	4	3	4	2	2	2	3	3	3	3	3
28	1	4	2	1	1	1	5	.	3	4	4	3	4	4	4	4	3	3	4	3	3	3	4	4	4	3	4	4	4	4	3	3	4	4	5	4	4	4	3	3	3	4	4	3	3	3	3	3	3
27	1	4	2	1	1	1	1	0	1	4	5	4	4	3	4	4	4	3	4	2	4	3	4	4	4	4	3	5	5	4	3	4	4	3	5	2	4	3	3	3	4	4	2	1	4	4	3	4	5
25	1	4	2	1	1	1	1	0	3	4	4	4	4	4	4	4	3	4	4	3	3	4	4	3	3	4	4	4	4	3	4	4	4	3	2	5	5	2	3	4	3	2	3	3	3	2	4	3	5
41	1	4	2	2	1	2	15	1	1	4	4	4	4	4	4	4	5	5	4	4	4	4	4	4	4	5	5	5	5	4	4	4	4	3	4	3	4	4	3	3	3	3	4	2	5	4	4	4	4
30	1	4	2	2	1	1	5	1	1	3	3	4	3	3	3	3	3	4	3	3	3	3	3	4	3	3	4	3	4	4	4	3	3	2	3	2	2	4	4	3	3	3	3	3	3	3	3	3	3
30	1	4	2	2	1	1	4	1	1	3	3	4	4	3	4	4	4	4	4	3	4	3	3	4	3	4	4	4	4	4	4	3	4	3	2	2	2	4	4	4	4	2	2	2	3	3	3	3	4
29	1	4	2	1	1	1	6	1	1	4	4	4	4	4	4	4	4	4	4	4	4	4	4	4	4	4	4	4	4	4	4	4	4	4	4	4	4	4	4	4	4	4	4	2	4	4	4	4	4
28	1	4	2	1	1	1	5	1	1	4	4	4	4	4	4	4	4	4	4	4	4	4	4	4	4	4	4	4	4	4	4	4	4	4	4	4	4	4	4	4	4	4	4	2	4	4	4	4	4
25	1	4	2	1	1	1	1	0	1	5	4	4	4	4	5	5	4	4	4	4	#NULL!	5	5	4	5	#NULL!	3	4	5	4	5	5	5	2	2	4	4	3	2	3	4	4	4	3	5	5	5	5	5
36	1	3	2	1	1	2	10	1	1	1	3	1	1	1	1	2	3	2	4	2	3	2	4	3	4	4	4	4	4	3	4	3	4	5	3	5	5	4	2	2	2	2	5	2	4	4	4	4	3
33	1	4	2	2	1	1	8	1	1	4	5	5	5	5	5	1	5	5	5	5	5	5	4	5	5	5	5	5	5	4	4	5	5	3	5	3	3	4	4	4	2	3	4	4	4	3	5	5	5
29	1	4	2	1	1	1	5	1	1	3	3	3	4	4	4	4	3	4	4	4	4	3	3	4	4	4	3	4	4	4	4	3	4	4	5	3	4	4	4	4	4	3	4	4	3	3	4	4	4
24	1	4	2	1	1	1	0.75	0	1	5	3	4	3	4	4	4	4	4	4	4	5	4	3	3	3	3	4	4	4	4	3	4	4	2	4	2	2	3	3	3	4	2	2	2	2	2	3	4	4
29	1	4	2	1	1	1	5	1	1	3	4	4	4	4	5	4	4	4	4	4	4	4	4	4	4	3	4	5	4	4	4	4	4	3	5	2	4	4	4	4	4	2	4	2	3	3	4	4	4
27	1	4	2	1	1	1	2	0	4	4	4	4	4	4	4	4	3	4	5	4	5	3	4	4	3	3	3	4	4	4	4	4	4	5	5	5	5	4	3	3	2	3	2	3	3	3	3	3	3
46	1	1	3	2	1	2	19	1	1	4	5	4	4	5	5	5	4	5	5	5	4	4	#NULL!	4	4	5	4	4	4	4	4	5	4	4	5	4	5	4	4	4	3	3	2	4	4	4	4	4	4
28	1	4	2	1	1	1	5	1	1	4	4	4	4	4	4	4	3	4	4	4	5	4	4	4	4	4	4	5	4	4	4	4	4	3	5	2	4	4	4	4	4	4	3	4	3	3	4	5	5
35	1	4	2	2	1	1	10	1	1	3	3	3	4	3	4	4	3	3	4	3	4	3	3	4	4	4	4	4	4	4	4	4	4	2	3	4	5	3	3	4	4	2	3	3	3	3	4	4	4
38	1	1	2	2	1	1	13	1	1	4	4	3	4	4	5	4	3	3	4	4	4	4	4	5	4	4	4	5	5	5	4	4	4	4	5	5	5	2	4	2	3	4	3	4	4	4	4	5	5
56	1	4	2	2	1	1	20	1	1	4	4	4	5	5	4	2	4	4	5	4	4	4	4	4	5	5	4	5	5	4	4	4	4	2	2	4	4	3	4	4	4	3	3	2	4	4	5	4	5
28	1	4	2	1	1	1	5	1	1	4	4	4	4	4	4	4	4	4	4	4	4	4	4	3	3	4	4	4	4	4	4	4	4	4	4	3	4	4	4	4	4	4	4	4	4	4	4	4	4
25	1	4	2	1	1	1	1	0	1	4	4	4	4	4	4	4	4	4	4	4	4	4	4	4	4	4	4	4	4	4	4	4	4	4	4	4	4	4	4	4	4	4	4	3	3	3	3	3	3
25	1	4	2	1	1	1	1	0	1	4	4	4	3	4	4	4	3	3	4	5	4	4	4	4	3	4	4	4	4	4	4	3	4	3	5	3	5	3	4	4	4	4	5	3	4	3	4	4	4
28	1	4	2	1	1	1	5	1	1	3	2	3	3	3	4	3	3	2	3	3	2	3	4	3	2	3	3	3	3	3	2	3	4	4	3	2	3	3	3	4	4	3	4	4	2	3	3	3	3
[truncated: 19 more columns]

## Sheet: codebook
variable	label	item	value
age	age		year
gender	gender		1 Male 2 female
religion	religion		1 Christianity 2 Buddhism 3 Catholicism 4 None 5 Other
education	degree		1 Graduate Degree 2 Undergraduate Degree 3 High School Diploma
M_S	marital status		1 Married 2 Single 3 Other
department	department		1 Ward 2 Emergency room 3 Operating theatre 4 Outpatient 5 Special part
status	status		1 Staff 2 Nurse 3 Charge nurse 4 Head nurse
career	total clinical career		year
Freq_safetyEdu	The number of safety education briefings attended		times
safetyedu	Hospital Accreditation Program for Healthcare Organization Experience		1 Yes 2 No
ppsc1	(2) The perception of patient safety culture1	Our hospital's senior leadership consistently communicates with employees regarding the significance of patient safety.	1 Strongly disagree 2 Disagree 3 neither agree nor disagree 4 Agree 5 Strongly agree
ppsc2	The perception of patient safety culture2	Our hospital has established a robust support system to address patient safety concerns.	1 Strongly disagree 2 Disagree 3 neither agree nor disagree 4 Agree 5 Strongly agree
ppsc3	The perception of patient safety culture3	The conduct of our hospital's senior leadership reflects a strong commitment to patient safety.	1 Strongly disagree 2 Disagree 3 neither agree nor disagree 4 Agree 5 Strongly agree
ppsc4	The perception of patient safety culture4	Our departmental head places significant emphasis on patient safety.	1 Strongly disagree 2 Disagree 3 neither agree nor disagree 4 Agree 5 Strongly agree
ppsc5	The perception of patient safety culture5	Our departmental head encourages and supports employee initiatives to enhance patient safety.	1 Strongly disagree 2 Disagree 3 neither agree nor disagree 4 Agree 5 Strongly agree
ppsc6	The perception of patient safety culture6	Our departmental head sets an example by actively contributing to efforts aimed at improving patient safety.	1 Strongly disagree 2 Disagree 3 neither agree nor disagree 4 Agree 5 Strongly agree
ppsc7	The perception of patient safety culture7	Our departmental head does not overlook patient safety issues within our department.	1 Strongly disagree 2 Disagree 3 neither agree nor disagree 4 Agree 5 Strongly agree
ppsc8	The perception of patient safety culture8	Our department has well-established systems, such as meeting structures and collaboration mechanisms, to ensure patient safety.	1 Strongly disagree 2 Disagree 3 neither agree nor disagree 4 Agree 5 Strongly agree
ppsc9	The perception of patient safety culture9	Our departmental head actively considers and reviews suggestions from employees to enhance patient safety.	1 Strongly disagree 2 Disagree 3 neither agree nor disagree 4 Agree 5 Strongly agree
ppsc10	The perception of patient safety culture10	Patient safety is ingrained into the daily routines of our hospital.	1 Strongly disagree 2 Disagree 3 neither agree nor disagree 4 Agree 5 Strongly agree
ppsc11	The perception of patient safety culture11	All departments within our hospital collaborate effectively to deliver safe patient care.	1 Strongly disagree 2 Disagree 3 neither agree nor disagree 4 Agree 5 Strongly agree
ppsc12	The perception of patient safety culture12	My colleagues and I provide mutual support and assistance during busy periods.	1 Strongly disagree 2 Disagree 3 neither agree nor disagree 4 Agree 5 Strongly agree
ppsc13	The perception of patient safety culture13	All departments, including clinical ones, are highly involved in initiatives aimed at improving patient safety in our hospital.	1 Strongly disagree 2 Disagree 3 neither agree nor disagree 4 Agree 5 Strongly agree
ppsc14	The perception of patient safety culture14	I prioritize adherence to principles over convenience when performing tasks	1 Strongly disagree 2 Disagree 3 neither agree nor disagree 4 Agree 5 Strongly agree
ppsc15	The perception of patient safety culture15	Employees in our hospital demonstrate strong compliance with regulations pertaining to patient safety.	1 Strongly disagree 2 Disagree 3 neither agree nor disagree 4 Agree 5 Strongly agree
ppsc16	The perception of patient safety culture16	I possess sufficient knowledge about which patient safety incidents need to be reported.	1 Strongly disagree 2 Disagree 3 neither agree nor disagree 4 Agree 5 Strongly agree
ppsc17	The perception of patient safety culture17	I have a comprehensive understanding of the concept of patient safety.	1 Strongly disagree 2 Disagree 3 neither agree nor disagree 4 Agree 5 Strongly agree
ppsc18	The perception of patient safety culture18	The content of patient safety education in our hospital is comprehensive, covering relevant regulations.	1 Strongly disagree 2 Disagree 3 neither agree nor disagree 4 Agree 5 Strongly agree
ppsc19	The perception of patient safety culture19	I consider adherence to patient safety principles fundamental to my role.	1 Strongly disagree 2 Disagree 3 neither agree nor disagree 4 Agree 5 Strongly agree
ppsc20	The perception of patient safety culture20	I consistently make efforts to act in a manner that ensures patient safety.	1 Strongly disagree 2 Disagree 3 neither agree nor disagree 4 Agree 5 Strongly agree
ppsc21	The perception of patient safety culture21	Hospital policies related to patient safety are effectively communicated to clinical settings.	1 Strongly disagree 2 Disagree 3 neither agree nor disagree 4 Agree 5 Strongly agree
ppsc22	The perception of patient safety culture22	Hospital policies related to patient safety are diligently implemented in clinical settings.	1 Strongly disagree 2 Disagree 3 neither agree nor disagree 4 Agree 5 Strongly agree
ppsc23	The perception of patient safety culture23	Our hospital has well-designed systems and procedures aimed at preventing errors.	1 Strongly disagree 2 Disagree 3 neither agree nor disagree 4 Agree 5 Strongly agree
ppsc24	The perception of patient safety culture24	Our hospital provides clear safety procedures for staff to follow.	1 Strongly disagree 2 Disagree 3 neither agree nor disagree 4 Agree 5 Strongly agree
ppsc25	The perception of patient safety culture25	I am concerned about potential repercussions when reporting patient safety incidents.	1 Strongly disagree 2 Disagree 3 neither agree nor disagree 4 Agree 5 Strongly agree
ppsc26	The perception of patient safety culture26	My colleagues and I receive constructive feedback that promotes learning when mistakes are made.	1 Strongly disagree 2 Disagree 3 neither agree nor disagree 4 Agree 5 Strongly agree
ppsc27	The perception of patient safety culture27	A high number of patient safety incident reports from our department is indicative of underlying issues.	1 Strongly disagree 2 Disagree 3 neither agree nor disagree 4 Agree 5 Strongly agree
ppsc28	The perception of patient safety culture28	I view patient safety issues as significant and believe they should not be concealed.	1 Strongly disagree 2 Disagree 3 neither agree nor disagree 4 Agree 5 Strongly agree
ppsc29	The perception of patient safety culture29	I have witnessed tangible improvements in hospital safety through the reporting of patient safety incidents.	1 Strongly disagree 2 Disagree 3 neither agree nor disagree 4 Agree 5 Strongly agree
ppsc30	The perception of patient safety culture30	Our hospital conducts thorough analyses to identify root causes when addressing patient safety issues.	1 Strongly disagree 2 Disagree 3 neither agree nor disagree 4 Agree 5 Strongly agree
ppsc31	The perception of patient safety culture31	When addressing patient safety concerns, our hospital prioritizes systemic and procedural approaches over individual punishments.	1 Strongly disagree 2 Disagree 3 neither agree nor disagree 4 Agree 5 Strongly agree
ppsc32	The perception of patient safety culture32	Our hospital fosters a culture of learning from mistakes made by others.	1 Strongly disagree 2 Disagree 3 neither agree nor disagree 4 Agree 5 Strongly agree
ppsc33	The perception of patient safety culture33	Occasionally, due to workload, I may not strictly adhere to patient safety procedures.	1 Strongly disagree 2 Disagree 3 neither agree nor disagree 4 Agree 5 Strongly agree
ppsc34	The perception of patient safety culture34	I find it challenging when additional tasks are introduced to improve patient safety.	1 Strongly disagree 2 Disagree 3 neither agree nor disagree 4 Agree 5 Strongly agree
ppsc35	The perception of patient safety culture35	In situations where efficiency clashes with patient safety principles during tasks with high workload, I prioritize efficiency.	1 Strongly disagree 2 Disagree 3 neither agree nor disagree 4 Agree 5 Strongly agree
sc1	(3) safety control1	I can change unsafe nursing practices in my unit.	1 Strongly disagree 2 Disagree 3 neither agree nor disagree 4 Agree 5 Strongly agree
sc2	safety control2	I can change the work environment in my department to promote safe nursing practice.	1 Strongly disagree 2 Disagree 3 neither agree nor disagree 4 Agree 5 Strongly agree
sc3	safety control3	I can take necessary actions to prevent accidents in nursing practice.	1 Strongly disagree 2 Disagree 3 neither agree nor disagree 4 Agree 5 Strongly agree
sc4	safety control4	I can identify and change my colleagues' unsafe practices when I see them.	1 Strongly disagree 2 Disagree 3 neither agree nor disagree 4 Agree 5 Strongly agree
sc5	safety control5	I can perform nursing care to ensure the safety of the patient and myself.	1 Strongly disagree 2 Disagree 3 neither agree nor disagree 4 Agree 5 Strongly agree
sc6	safety control6	I am good at applying protective equipment according to regulations when performing nursing care.	1 Strongly disagree 2 Disagree 3 neither agree nor disagree 4 Agree 5 Strongly agree
sc7	safety control7	I can control myself to follow safe instructions according to regulations.	1 Strongly disagree 2 Disagree 3 neither agree nor disagree 4 Agree 5 Strongly agree
psc1	(4) Patient safety competence1	Errors in healthcare are preventable.	1 Strongly disagree 2 Disagree 3 neither agree nor disagree 4 Agree 5 Strongly agree
psc2	Patient safety competence2	Healthcare workers should always strive to promote patient safety.	1 Strongly disagree 2 Disagree 3 neither agree nor disagree 4 Agree 5 Strongly agree
psc3	Patient safety competence3	Healthcare workers should not tolerate uncertainty in patient care (e.g., uncertainty about patient-related problems, diagnoses, specific treatments, procedures, uncertainty in communication, etc.	1 Strongly disagree 2 Disagree 3 neither agree nor disagree 4 Agree 5 Strongly agree
psc4	Patient safety competence4	Patient safety needs to be taught in nursing school curricula	1 Strongly disagree 2 Disagree 3 neither agree nor disagree 4 Agree 5 Strongly agree
psc5	Patient safety competence5	Healthcare staff should regularly share information about errors and their root causes.	1 Strongly disagree 2 Disagree 3 neither agree nor disagree 4 Agree 5 Strongly agree
psc6	Patient safety competence6	Healthcare workers should prioritize patient safety	1 Strongly disagree 2 Disagree 3 neither agree nor disagree 4 Agree 5 Strongly agree
psc7	Patient safety competence7	Healthcare workers should report errors when they occur	1 Strongly disagree 2 Disagree 3 neither agree nor disagree 4 Agree 5 Strongly agree
psc8	Patient safety competence8	Healthcare workers should inform patients and their families of any change in condition due to an error.	1 Strongly disagree 2 Disagree 3 neither agree nor disagree 4 Agree 5 Strongly agree
psc9	Patient safety competence9	Errors that do not cause harm to the patient do not need to be reported.	1 Strongly disagree 2 Disagree 3 neither agree nor disagree 4 Agree 5 Strongly agree
psc10	Patient safety competence10	If I find an error, I will not tell anyone.	1 Strongly disagree 2 Disagree 3 neither agree nor disagree 4 Agree 5 Strongly agree
psc11	Patient safety competence11		1 Strongly disagree 2 Disagree 3 neither agree nor disagree 4 Agree 5 Strongly agree
psc12	Patient safety competence12	Information technology and computer systems (e.g., barcodes, electronic medical records, automatic alarms/beepers) should be used appropriately for patient safety.	1 Strongly disagree 2 Disagree 3 neither agree nor disagree 4 Agree 5 Strongly agree
psc13	Patient safety competence13	Each member of the healthcare team plays an important role in error prevention	1 Strongly disagree 2 Disagree 3 neither agree nor disagree 4 Agree 5 Strongly agree
psc14	Patient safety competence14	Nurses should be involved in the design, selection, implementation and evaluation of information technology to improve patient safety.	1 Strongly disagree 2 Disagree 3 neither agree nor disagree 4 Agree 5 Strongly agree
mean_ppsc	mean-the perception of patient safety culture	Standardized procedures minimize the risk of patient handover (e.g., transfer, shift, etc.).	1 Strongly disagree 2 Disagree 3 neither agree nor disagree 4 Agree 5 Strongly agree
mean_sc	mean-safety control		1 Strongly disagree 2 Disagree 3 neither agree nor disagree 4 Agree 5 Strongly agree
mean_psc	mean-patient safety competence		1 Strongly disagree 2 Disagree 3 neither agree nor disagree 4 Agree 5 Strongly agree
